# Supplementary material for: Poly(A) inclusive RNA isoform sequencing (PAIso−seq) reveals wide-spread non-adenosine residues within RNA poly(A) tails
Source: PubMed Central journal article supplement (PMC6876564; doi:10.1038/s41467-019-13228-9), 2019-11-22
Supplement: 41467_2019_13228_MOESM1_ESM.pdf [file 41467_2019_13228_MOESM1_ESM.pdf]

**Poly(A) inclusive RNA isoform sequencing (PAIso-seq) reveals wide-spread non-adenosine residues within RNA poly(A) tails**

Liu, *et al.*

**Supplementary Information**

The supplementary information consists of 7 supplementary figures and 4 supplementary tables.

## SUPPLEMENTARY FIGURES

a

| Samples   | CCS read counts |
|-----------|-----------------|
| GV rep.1  | 79,994          |
| GV rep.2  | 227,902         |
| SCGV com. | 191,023         |
| Rat liver | 83,237          |

b

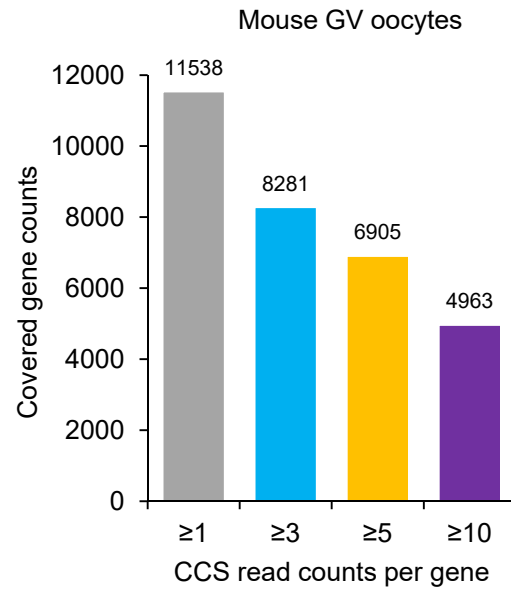

c

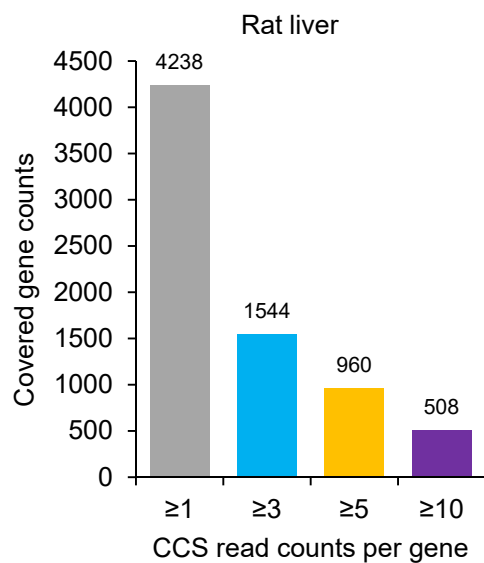

### Supplementary Figure 1. Transcripts captured by PAlso-seq in mouse GV oocytes and Rat liver.

(a) CCS read counts in three replicates of GV oocytes and Rat liver samples. One transcript here refers to one CCS read that can map to the corresponding transcriptome or genome.

(b-c) Number of genes at given coverage in mouse GV oocytes (B), Rat liver (C).

a

TSO-barcode-mcherry-polyA-TSO

AAGCAGTGGTATCAACGCAGAGTACCGCTGCGAGAGACAGTATGGTGAGCAAGGGCGAGGAGGATAACATGGCCATCATCAAGGAGTTCATGCGCTTCAAGGTGCACATGGAGGGCTCCGTGAACGGCCACGAGTT  
CGAGATCGAGGGCGAGGGCGAGGGCCGCCCTACGAGGGCACCCAGACCCGCAAGCTGAAGGTGACCAAGGGTGGCCCCCTGCCCTTCGCTGGGACATCCTGTCCCCTCAGTTCATGTACGGCTCCAAGGCCTAC  
GTGAAGCACCCCGCGACATCCCGACTACTTGAAGCTGTCTTCCCAGGGGCTTCAAGTGGGAGCGGTGATGAACCTCGAGGACGGCGGTGGTGACCGTGACCCAGGACTCCTCCCTGCAGGACGGCGAGT  
TCATCTACAAGGTGAAGCTGCGGGCACCAACTTCCCCTCCGACGGCCCGTAATGCAGAAGAAGACCATGGGCTGGGAGGCTCCTCCGAGCGGATGACCCGAGGACGGCGCCCTGAAGGGCGAGATCAAGCA  
GAGGCTGAAGCTGAAGGACGGCGGCCACTACGACGCTGAGGTCAAGACCACCTACAAGGCCAAGAAGCCCGTGCAGCTGCCGGCGCTACAACGTCAACATCAAGTTGGACATCACTCCCAACGAGGACTAC  
ACCATCGTGAACAGTACGAACGGCGAGGGCCGCCACTCCACGGCGCATGGACGAGCTGTACAAGTGA~~AAAAAAAAA~~GTACTCTGCGTTGATACCACTGCTT (0A)

AAGCAGTGGTATCAACGCAGAGTACCGCTGTCGCGGCACAAATGGTGAGCAAGGGCGAGGAGGATAACATGGCCATCATCAAGGAGTTCATGCGCTTCAAGGTGCACATGGAGGGCTCCGTGAACGGCCACGAGTT  
CGAGATCGAGGGCGAGGGCGAGGGCCGCCCTACGAGGGCACCCAGACCCGCAAGCTGAAGGTGACCAAGGGTGGCCCCCTGCCCTTCGCTGGGACATCCTGTCCCCTCAGTTCATGTACGGCTCCAAGGCCTAC  
GTGAAGCACCCCGCGACATCCCGACTACTTGAAGCTGTCTTCCCAGGGGCTTCAAGTGGGAGCGGTGATGAACCTCGAGGACGGCGGTGGTGACCGTGACCCAGGACTCCTCCCTGCAGGACGGCGAGT  
TCATCTACAAGGTGAAGCTGCGGGCACCAACTTCCCCTCCGACGGCCCGTAATGCAGAAGAAGACCATGGGCTGGGAGGCTCCTCCGAGCGGATGACCCGAGGACGGCGCCCTGAAGGGCGAGATCAAGCA  
GAGGCTGAAGCTGAAGGACGGCGGCCACTACGACGCTGAGGTCAAGACCACCTACAAGGCCAAGAAGCCCGTGCAGCTGCCGGCGCTACAACGTCAACATCAAGTTGGACATCACTCCCAACGAGGACTAC  
ACCATCGTGAACAGTACGAACGGCGAGGGCCGCCACTCCACGGCGCATGGACGAGCTGTACAAGTGA~~AAAAAAAAA~~GTACTCTGCGTTGATACCACTGCTT (10A)

AAGCAGTGGTATCAACGCAGAGTACACAGTGCCTGTCTATATGGTGAGCAAGGGCGAGGAGGATAACATGGCCATCATCAAGGAGTTCATGCGCTTCAAGGTGCACATGGAGGGCTCCGTGAACGGCCACGAGTT  
CGAGATCGAGGGCGAGGGCGAGGGCCGCCCTACGAGGGCACCCAGACCCGCAAGCTGAAGGTGACCAAGGGTGGCCCCCTGCCCTTCGCTGGGACATCCTGTCCCCTCAGTTCATGTACGGCTCCAAGGCCTAC  
GTGAAGCACCCCGCGACATCCCGACTACTTGAAGCTGTCTTCCCAGGGGCTTCAAGTGGGAGCGGTGATGAACCTCGAGGACGGCGGTGGTGACCGTGACCCAGGACTCCTCCCTGCAGGACGGCGAGT  
TCATCTACAAGGTGAAGCTGCGGGCACCAACTTCCCCTCCGACGGCCCGTAATGCAGAAGAAGACCATGGGCTGGGAGGCTCCTCCGAGCGGATGACCCGAGGACGGCGCCCTGAAGGGCGAGATCAAGCA  
GAGGCTGAAGCTGAAGGACGGCGGCCACTACGACGCTGAGGTCAAGACCACCTACAAGGCCAAGAAGCCCGTGCAGCTGCCGGCGCTACAACGTCAACATCAAGTTGGACATCACTCCCAACGAGGACTAC  
ACCATCGTGAACAGTACGAACGGCGAGGGCCGCCACTCCACGGCGCATGGACGAGCTGTACAAGTGA~~AAAAAAAAAAAAAAAAAAAAAAAAAAAAAAAAAAAAAAAAA~~GTACTCTGCGTTGATACCACTGCTT (30A)

AAGCAGTGGTATCAACGCAGAGTACTCACACTTAGAGCGAATGGTGAGCAAGGGCGAGGAGGATAACATGGCCATCATCAAGGAGTTCATGCGCTTCAAGGTGCACATGGAGGGCTCCGTGAACGGCCACGAGTT  
CGAGATCGAGGGCGAGGGCGAGGGCCGCCCTACGAGGGCACCCAGACCCGCAAGCTGAAGGTGACCAAGGGTGGCCCCCTGCCCTTCGCTGGGACATCCTGTCCCCTCAGTTCATGTACGGCTCCAAGGCCTAC  
GTGAAGCACCCCGCGACATCCCGACTACTTGAAGCTGTCTTCCCAGGGGCTTCAAGTGGGAGCGGTGATGAACCTCGAGGACGGCGGTGGTGACCGTGACCCAGGACTCCTCCCTGCAGGACGGCGAGT  
TCATCTACAAGGTGAAGCTGCGGGCACCAACTTCCCCTCCGACGGCCCGTAATGCAGAAGAAGACCATGGGCTGGGAGGCTCCTCCGAGCGGATGACCCGAGGACGGCGCCCTGAAGGGCGAGATCAAGCA  
GAGGCTGAAGCTGAAGGACGGCGGCCACTACGACGCTGAGGTCAAGACCACCTACAAGGCCAAGAAGCCCGTGCAGCTGCCGGCGCTACAACGTCAACATCAAGTTGGACATCACTCCCAACGAGGACTAC  
ACCATCGTGAACAGTACGAACGGCGAGGGCCGCCACTCCACGGCGCATGGACGAGCTGTACAAGTGA~~AAAAAAAAAAAAAAAAAAAAAAAAAAAAAAAAAAAAAAAAA~~GTACTCTGCGTTGATACCACTGCTT (50A)

AAGCAGTGGTATCAACGCAGAGTACTCACATATGTATACATATGGTGAGCAAGGGCGAGGAGGATAACATGGCCATCATCAAGGAGTTCATGCGCTTCAAGGTGCACATGGAGGGCTCCGTGAACGGCCACGAGTT  
CGAGATCGAGGGCGAGGGCGAGGGCCGCCCTACGAGGGCACCCAGACCCGCAAGCTGAAGGTGACCAAGGGTGGCCCCCTGCCCTTCGCTGGGACATCCTGTCCCCTCAGTTCATGTACGGCTCCAAGGCCTAC  
GTGAAGCACCCCGCGACATCCCGACTACTTGAAGCTGTCTTCCCAGGGGCTTCAAGTGGGAGCGGTGATGAACCTCGAGGACGGCGGTGGTGACCGTGACCCAGGACTCCTCCCTGCAGGACGGCGAGT  
TCATCTACAAGGTGAAGCTGCGGGCACCAACTTCCCCTCCGACGGCCCGTAATGCAGAAGAAGACCATGGGCTGGGAGGCTCCTCCGAGCGGATGACCCGAGGACGGCGCCCTGAAGGGCGAGATCAAGCA  
GAGGCTGAAGCTGAAGGACGGCGGCCACTACGACGCTGAGGTCAAGACCACCTACAAGGCCAAGAAGCCCGTGCAGCTGCCGGCGCTACAACGTCAACATCAAGTTGGACATCACTCCCAACGAGGACTAC  
ACCATCGTGAACAGTACGAACGGCGAGGGCCGCCACTCCACGGCGCATGGACGAGCTGTACAAGTGA~~AAAAAAAAAAAAAAAAAAAAAAAAAAAAAAAAAAAAAAAAA~~GTACTCTGCGTTGATACCACTGCTT (70A)

AAGCAGTGGTATCAACGCAGAGTACCGCTGCGAGAGACAGTATGGTGAGCAAGGGCGAGGAGGATAACATGGCCATCATCAAGGAGTTCATGCGCTTCAAGGTGCACATGGAGGGCTCCGTGAACGGCCACGAGTT  
CGAGATCGAGGGCGAGGGCGAGGGCCGCCCTACGAGGGCACCCAGACCCGCAAGCTGAAGGTGACCAAGGGTGGCCCCCTGCCCTTCGCTGGGACATCCTGTCCCCTCAGTTCATGTACGGCTCCAAGGCCTAC  
GTGAAGCACCCCGCGACATCCCGACTACTTGAAGCTGTCTTCCCAGGGGCTTCAAGTGGGAGCGGTGATGAACCTCGAGGACGGCGGTGGTGACCGTGACCCAGGACTCCTCCCTGCAGGACGGCGAGT  
TCATCTACAAGGTGAAGCTGCGGGCACCAACTTCCCCTCCGACGGCCCGTAATGCAGAAGAAGACCATGGGCTGGGAGGCTCCTCCGAGCGGATGACCCGAGGACGGCGCCCTGAAGGGCGAGATCAAGCA  
GAGGCTGAAGCTGAAGGACGGCGGCCACTACGACGCTGAGGTCAAGACCACCTACAAGGCCAAGAAGCCCGTGCAGCTGCCGGCGCTACAACGTCAACATCAAGTTGGACATCACTCCCAACGAGGACTAC  
ACCATCGTGAACAGTACGAACGGCGAGGGCCGCCACTCCACGGCGCATGGACGAGCTGTACAAGTGA~~AAAAAAAAAAAAAAAAAAAAAAAAAAAAAAAAAAAAAAAAA~~GTACTCTGCGTTGATACCACTGCTT (100A)

b

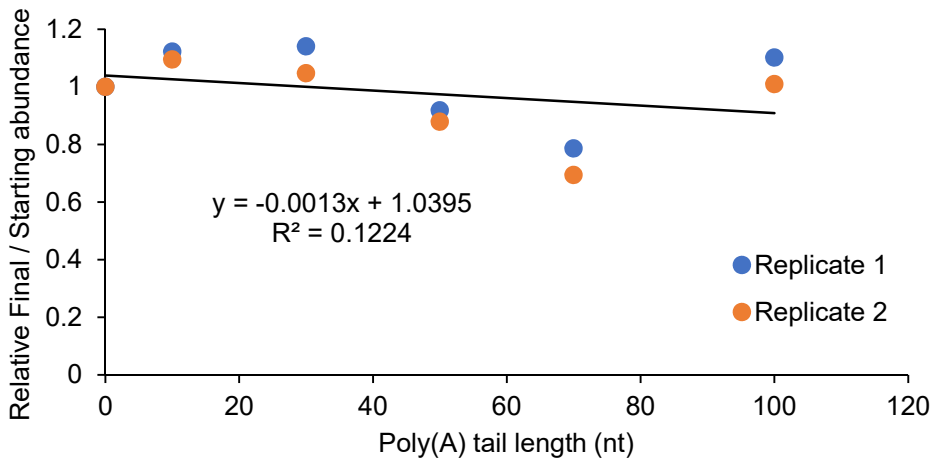

**Supplementary Figure 2. The poly(A) spike-ins with 0, 10, 30, 50, 70 and 100As.**

(a) The model of the spike-in sequences is shown on the top.

(b) Relative CCS reads recovery rate of the spike-ins of different poly(A) tail length. All spike-ins were normalized to the spike-in of 0 length. The linear regression line is shown in black. The spike-ins are included in two independent runs. Data points for the two replicates are shown in different colors. The slope is -0.0013 and y-axis intercept is 1.0395.

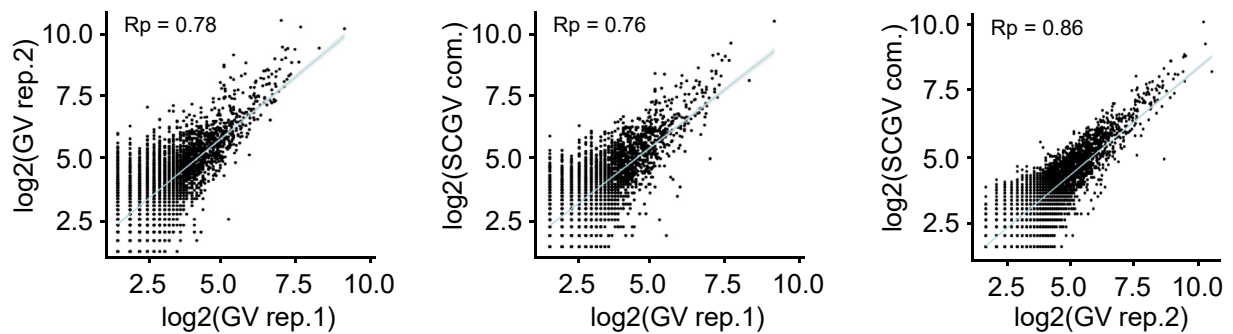

**Supplementary Figure 3. The correlation of gene expression among three replicates.**

The Pearson correlation of gene expression (transcripts per gene) among three replicates of GV oocytes. GV rep.1: GV replicate1, GV rep.2: GV replicate 2 and SCGV com.: Single cell GV oocytes combined. The blue line represents linear regression line. The light gray area represents confidence interval of the regression. This comparison counts the number of transcript only, therefore, reads used here are not filtered based on passes.  $n = 4,417$  (left panel),  $n = 4,190$  (middle panel),  $n = 5,258$  (right panel).

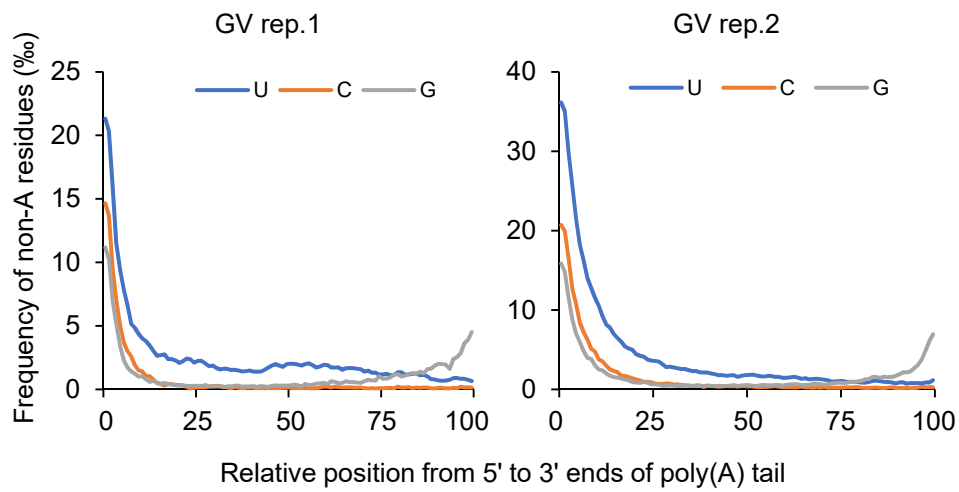

**Supplementary Figure 4. Frequency of non-adenosine residues in relative position from 5' to 3' ends of RNA poly(A) tails.**

The relative position is from 5' (0) to 3' (100) ends of RNA poly(A) tails. The signal intensity is average of all the poly(A) tails of CCS reads mappable to the genome.

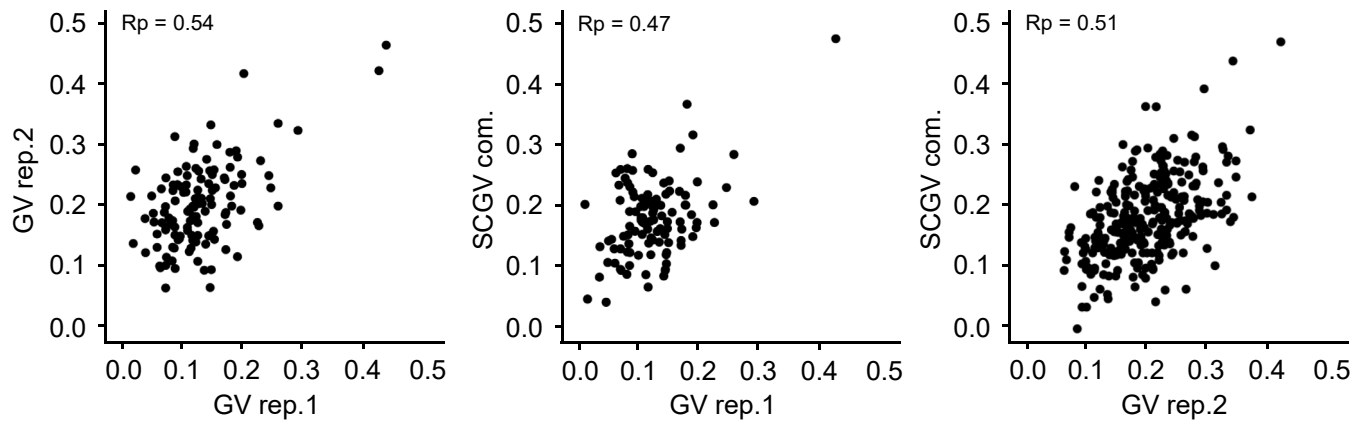

**Supplementary Figure 5. Correlation of the ratio of transcripts containing non-A modifications of genes between different replicates of GV oocyte samples.**

Genes with no less than 40 CCS reads in each of the replicates are included in the analysis.  $n = 122$  (left panel),  $n = 108$  (middle panel),  $n = 297$  (right panel). “Rp” refers to Pearson correlation coefficient.

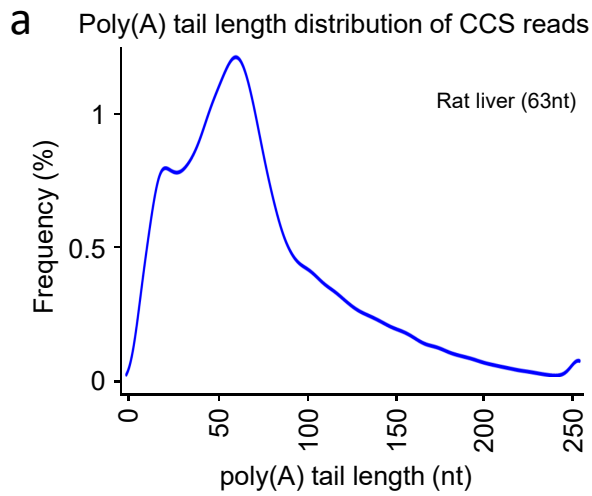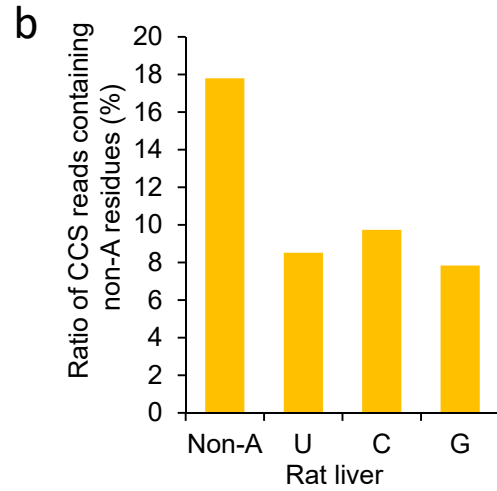

**Supplementary Figure 6. Poly(A) tail length and non-A modification ratio in rat liver sample.**

(a) The distribution of poly(A) tail length of all genes in rat liver sample. The median poly(A) tail length of the CCS reads is shown on the top.

(b) The ratio of CCS reads containing non-A modifications in rat liver samples.



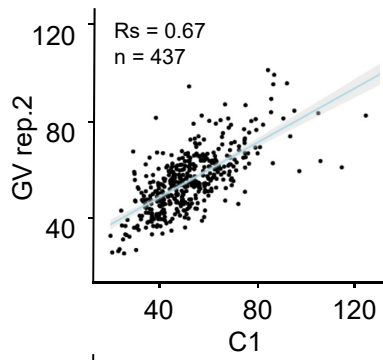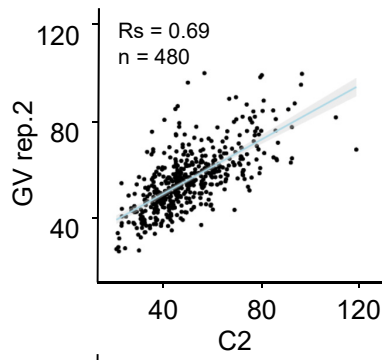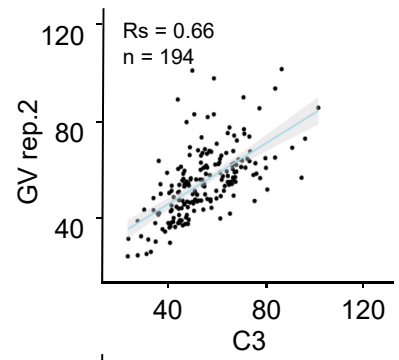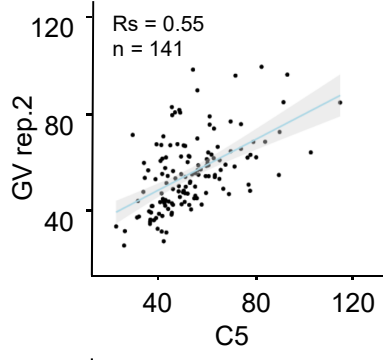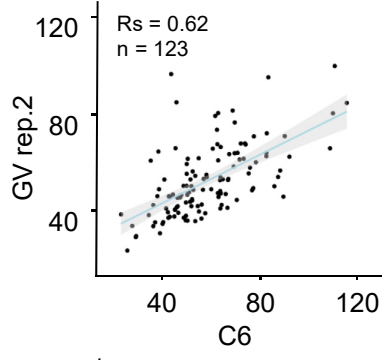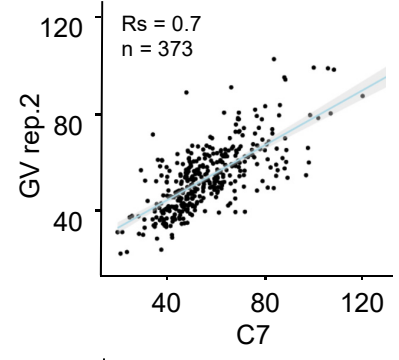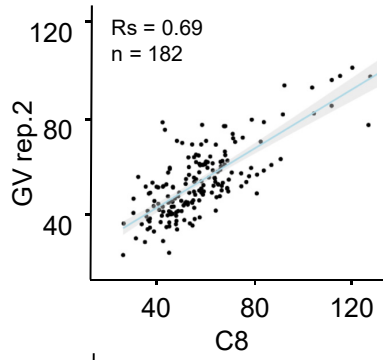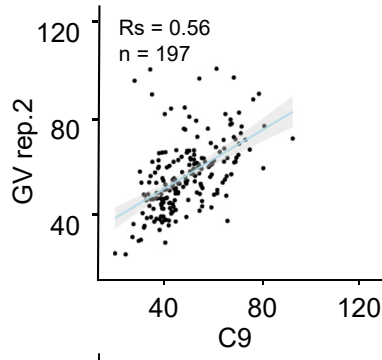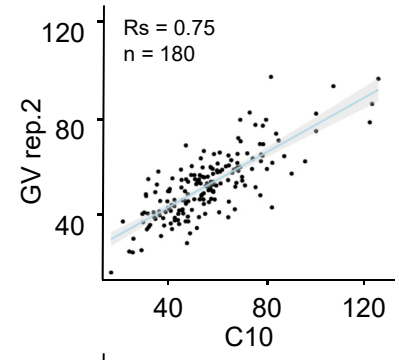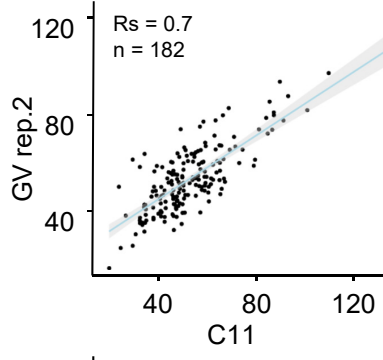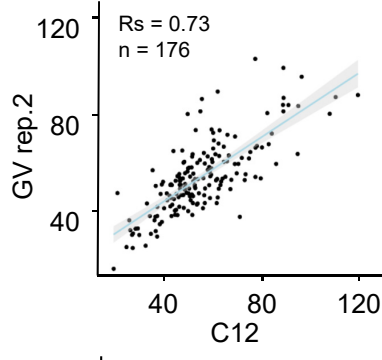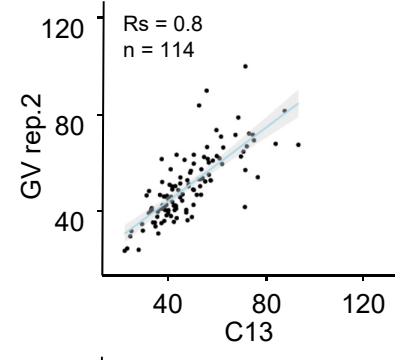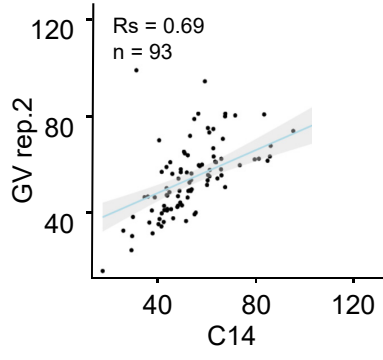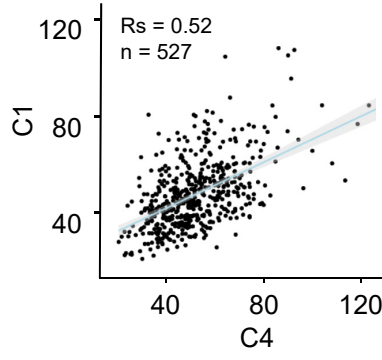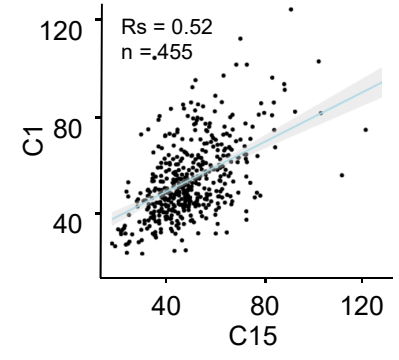

**Supplementary Figure 7. Correlation of poly(A) tail length between single GV oocyte and bulk samples.**

C1 (cell 1) to C15 are single-cell samples. GV rep.2 is bulk sample replicate 2. The blue line represents linear regression line. The light gray area represents confidence interval of the regression. Genes with at least 4 CCS reads in each of the datasets are included in the analysis.

**Supplementary Table 1. Oligos for PAIso-seq library construction.**

| Name       | Sequence (5'->3')                                                    |
|------------|----------------------------------------------------------------------|
| TSO        | AAGCAGTGGTATCAACGCAGAGTACATrGrG+G                                    |
| RT primer  | AAGCAGTGGTATCAACGCAGAGTAC                                            |
| PCR primer | AAGCAGTGGTATCAACGCAGAGT                                              |
| 2dU-BC1    | AAGCAGTGGTATCAACGCAGAGTACTCAGACGATGCGTCAT<br>dUTTTTTTTTTdUTTTTTTTTT  |
| 2dU-BC2    | AAGCAGTGGTATCAACGCAGAGTACCTATACATGACTCTGCd<br>UTTTTTTTTTdUTTTTTTTTT  |
| 2dU-BC3    | AAGCAGTGGTATCAACGCAGAGTACTACTAGAGTAGCACTC<br>dUTTTTTTTTTdUTTTTTTTTT  |
| 2dU-BC4    | AAGCAGTGGTATCAACGCAGAGTACTGTGTATCAGTACATGd<br>UTTTTTTTTTdUTTTTTTTTT  |
| 2dU-BC5    | AAGCAGTGGTATCAACGCAGAGTACGATCTCTACTATATGCd<br>UTTTTTTTTTdUTTTTTTTTT  |
| 2dU-BC6    | AAGCAGTGGTATCAACGCAGAGTACACAGTCTATACTGCTGd<br>UTTTTTTTTTdUTTTTTTTTT  |
| 2dU-BC7    | AAGCAGTGGTATCAACGCAGAGTAC ATGATGTGCTACATCT<br>dUTTTTTTTTTdUTTTTTTTTT |
| 2dU-BC8    | AAGCAGTGGTATCAACGCAGAGTAC CTGCGTGCTCTACGAC<br>dUTTTTTTTTTdUTTTTTTTTT |
| 2dU-BC9    | AAGCAGTGGTATCAACGCAGAGTAC GCGCGATACGATGACT<br>dUTTTTTTTTTdUTTTTTTTTT |
| 2dU-BC10   | AAGCAGTGGTATCAACGCAGAGTAC CGCGCTCAGCTGATCG<br>dUTTTTTTTTTdUTTTTTTTTT |
| 2dU-BC11   | AAGCAGTGGTATCAACGCAGAGTAC<br>GCGCACGCACTACAGA dUTTTTTTTTTdUTTTTTTTTT |
| 2dU-BC12   | AAGCAGTGGTATCAACGCAGAGTAC<br>ACACTGACGTCGCGAC dUTTTTTTTTTdUTTTTTTTTT |
| 2dU-BC13   | AAGCAGTGGTATCAACGCAGAGTAC CGTCTATATACGTATA<br>dUTTTTTTTTTdUTTTTTTTTT |
| 2dU-BC14   | AAGCAGTGGTATCAACGCAGAGTAC ATAGAGACTCAGAGCT<br>dUTTTTTTTTTdUTTTTTTTTT |
| 2dU-BC15   | AAGCAGTGGTATCAACGCAGAGTAC<br>TAGATGCGAGAGTAGA dUTTTTTTTTTdUTTTTTTTTT |

Note: rG, the ribonucleic guanylic acid; +G, the locked nucleic acid-modified deoxyguanylic acid; dU, the deoxyuridylic acid.

**Supplementary Table 2. Oligos for PAT assay.**

| Name           | 5'→3'                                               |
|----------------|-----------------------------------------------------|
| PAT-C10T2      | AAGCAGTGGTATCAACGCAGAGTACCCCCCCCCCTT                |
| PAT-PCR-R      | AAGCAGTGGTATCAACGCAGAGT                             |
| PAT-Cnot6l-F   | TGTGAACATTGACTAAACAAAGCAGTCCTGCC                    |
| PAT-Plat-F     | ATCCTTGAGATCATGCACTCCCCATCCC                        |
| PAT-Zp2-F      | ACACAATGACGGTTAGCCTTCCAGGACC                        |
| PAT-Npm2-F     | CTTAGCATCTTCTGCGTCCAAGGCAGG                         |
| PAT-Tle6-F     | GACTGAGAACGGCAGGCTCATCATCAC                         |
| PAT-Dnmt1-F    | GTTTTGTGACCAAGCTGTGTAGTACTTTGTGC                    |
| PAT-Btg4-F     | GTAGGTTTTCAACTAAGGAAGAT                             |
| PAT-Cnot7-F    | TGGACTACAAGTTGTAATGTGTG                             |
| PAT-Cnot6l-RA0 | TGCGGTTGCAAAATGGCCATTTATTGCC                        |
| PAT-Plat-RA0   | GGAAAAGTGTGAAAATACCTCTGAATTTATTATTTAAGTACAGTATAATAC |
| PAT-Zp2-RA0    | AACTGCAGTCTCTTTATTTGCAAGTCCAATCAGTG                 |
| PAT-Npm2-RA0   | CTGATCATGCAAATTTTATTGTGGCCCTAGGCGAG                 |
| PAT-Tle6-RA0   | GCCATTTCAATTGTTTTATTACACGCAACTCGGG                  |
| PAT-Dnmt1-RA0  | GGGTGCTTGACAGAAGCGCTTTATTTTGAAG                     |
| PAT-Btg4-RA0   | GGCTTAGTTTGAATACTTTATTAGAAGCAAGTACCAC               |
| PAT-Cnot7-RA0  | ATATAGGAAAACATTTTTGAAGCCTTTATTTACAAAAGCTTTAAAAAC    |

**Supplementary Table 3. Oligos for Poly(A) spike-ins.**

|            |                                                                                                                                                                              |
|------------|------------------------------------------------------------------------------------------------------------------------------------------------------------------------------|
| PSI-0A-F   | AAGCAGTGGTATCAACGCAGAGTACGCACATACACGCTCACATGGT<br>GAGCAAGGGCGAGGAGGATAAC                                                                                                     |
| PSI-0A-R   | AAGCAGTGGTATCAACGCAGAGTACTCACTTGTACAGCTCGTCCATG<br>CCGCCGGTG                                                                                                                 |
| PSI-10A-F  | AAGCAGTGGTATCAACGCAGAGTACGCTCGTCGCGCGCACAATGGT<br>GAGCAAGGGCGAGGAGGATAAC                                                                                                     |
| PSI-10A-R  | AAGCAGTGGTATCAACGCAGAGTACTTTTTTTTTTTCACTTGTACAG<br>CTCGTCCATGCCGCCGGTG                                                                                                       |
| PSI-30A-F  | AAGCAGTGGTATCAACGCAGAGTACACAGTGCGCTGTCTATATGGTG<br>AGCAAGGGCGAGGAGGATAAC                                                                                                     |
| PSI-30A-R  | AAGCAGTGGTATCAACGCAGAGTACTTTTTTTTTTTTTTTTTTTTTTTT<br>TTTTTTTTTCACTTGTACAGCTCGTCCATGCCGCCGGTG                                                                                 |
| PSI-50A-F  | AAGCAGTGGTATCAACGCAGAGTACTCACACTCTAGAGCGAATGGT<br>GAGCAAGGGCGAGGAGGATAAC                                                                                                     |
| PSI-50A-R  | AAGCAGTGGTATCAACGCAGAGTACTTTTTTTTTTTTTTTTTTTTTTTT<br>TTTTTTTTTTTTTTTTTTTTTTTTTTTTTTTTTTTTTCACTTGTACAGCTCGTCCATGC<br>CGCCGGTG                                                 |
| PSI-70A-F  | AAGCAGTGGTATCAACGCAGAGTACTCACATATGTATACATATGGTG<br>AGCAAGGGCGAGGAGGATAAC                                                                                                     |
| PSI-70A-R  | AAGCAGTGGTATCAACGCAGAGTACTTTTTTTTTTTTTTTTTTTTTTTT<br>TTTTTTTTTTTTTTTTTTTTTTTTTTTTTTTTTTTTTTTTTTTTTTTTTTTTCAC<br>TTGTACAGCTCGTCCATGC                                          |
| PSI-100A-F | AAGCAGTGGTATCAACGCAGAGTACCGCTGCGAGAGACAGTATGGT<br>GAGCAAGGGCGAGGAGGATAAC                                                                                                     |
| PSI-100A-R | AAGCAGTGGTATCAACGCAGAGTACTTTTTTTTTTTTTTTTTTTTTTTT<br>TTTTTTTTTTTTTTTTTTTTTTTTTTTTTTTTTTTTTTTTTTTTTTTTTTT<br>TTTTTTTTTTTTTTTTTTTTTTTTTTTTTTTTTTTTTCACTTGTACAGCTCGTCCATGC<br>C |

**Supplementary Table 4. Genes with transcripts of poly(A) tails longer than 200 nt in all replicates**

| Replicates | CCS ID                            | Gene          | Passes | Poly(A) tail length (nt) |
|------------|-----------------------------------|---------------|--------|--------------------------|
| GV rep.1   | m54219_190112_025724/55443787/ccs | Alg13         | 48     | 202                      |
| GV rep.2   | m54308_190404_064332/64422124/ccs | Alg13         | 81     | 220                      |
| SCGV com.  | m54308_190404_170532/59572332/ccs | Alg13         | 109    | 207                      |
| SCGV com.  | m54308_190404_170532/31457392/ccs | Alg13         | 12     | 204                      |
|            |                                   |               |        |                          |
| GV rep.1   | m54219_190112_025724/68551136/ccs | Birc5         | 26     | 251                      |
| GV rep.2   | m54308_190404_064332/24445571/ccs | Birc5         | 98     | 213                      |
| SCGV com.  | m54308_190404_170532/39257071/ccs | Birc5         | 11     | 214                      |
|            |                                   |               |        |                          |
| GV rep.1   | m54219_190125_035319/57738087/ccs | Bpgm          | 21     | 244                      |
| GV rep.2   | m54308_190404_064332/6095376/ccs  | Bpgm          | 24     | 231                      |
| GV rep.2   | m54308_190404_064332/54198525/ccs | Bpgm          | 29     | 225                      |
| GV rep.2   | m54308_190404_064332/56165157/ccs | Bpgm          | 12     | 203                      |
| SCGV com.  | m54308_190404_170532/22937765/ccs | Bpgm          | 11     | 247                      |
| SCGV com.  | m54308_190404_170532/50725113/ccs | Bpgm          | 100    | 245                      |
| SCGV com.  | m54308_190404_170532/49545726/ccs | Bpgm          | 11     | 202                      |
|            |                                   |               |        |                          |
| GV rep.1   | m54219_190112_025724/50135571/ccs | Cox6a1        | 57     | 221                      |
| GV rep.1   | m54219_190125_035319/33948208/ccs | Cox6a1        | 13     | 209                      |
| GV rep.2   | m54308_190404_064332/9371713/ccs  | Cox6a1        | 10     | 301                      |
| SCGV com.  | m54308_190404_170532/68944188/ccs | Cox6a1        | 135    | 204                      |
|            |                                   |               |        |                          |
| GV rep.1   | m54219_190112_025724/11076152/ccs | Cox6c         | 26     | 217                      |
| GV rep.2   | m54308_190404_064332/48300206/ccs | Cox6c         | 139    | 231                      |
| GV rep.2   | m54308_190404_064332/10617801/ccs | Cox6c         | 38     | 218                      |
| SCGV com.  | m54308_190404_170532/7144372/ccs  | Cox6c         | 14     | 267                      |
|            |                                   |               |        |                          |
| GV rep.1   | m54219_190112_025724/61014917/ccs | E330017A01Rik | 16     | 323                      |
| GV rep.1   | m54219_190112_025724/34406553/ccs | E330017A01Rik | 10     | 244                      |
| GV rep.1   | m54219_190125_035319/48628617/ccs | E330017A01Rik | 21     | 217                      |
| GV rep.1   | m54219_190112_025724/71369322/ccs | E330017A01Rik | 59     | 206                      |
| GV rep.2   | m54308_190404_064332/49152223/ccs | E330017A01Rik | 40     | 331                      |
| GV rep.2   | m54308_190404_064332/32113109/ccs | E330017A01Rik | 25     | 256                      |
| GV rep.2   | m54308_190404_064332/6554335/ccs  | E330017A01Rik | 103    | 256                      |
| GV rep.2   | m54308_190404_064332/39911687/ccs | E330017A01Rik | 28     | 255                      |
| GV rep.2   | m54308_190404_064332/54330289/ccs | E330017A01Rik | 35     | 251                      |

|           |                                   |               |     |     |
|-----------|-----------------------------------|---------------|-----|-----|
| GV rep.2  | m54308_190404_064332/5177437/ccs  | E330017A01Rik | 10  | 249 |
| GV rep.2  | m54308_190404_064332/37617836/ccs | E330017A01Rik | 23  | 235 |
| GV rep.2  | m54308_190404_064332/68026482/ccs | E330017A01Rik | 15  | 226 |
| GV rep.2  | m54308_190404_064332/38405084/ccs | E330017A01Rik | 120 | 225 |
| GV rep.2  | m54308_190404_064332/52363703/ccs | E330017A01Rik | 128 | 204 |
| GV rep.2  | m54308_190404_064332/47776172/ccs | E330017A01Rik | 98  | 201 |
| SCGV com. | m54308_190404_170532/42205584/ccs | E330017A01Rik | 21  | 264 |
|           |                                   |               |     |     |
| GV rep.1  | m54219_190112_025724/65995444/ccs | Fbxw14        | 10  | 317 |
| GV rep.2  | m54308_190404_064332/52035776/ccs | Fbxw14        | 83  | 221 |
| GV rep.2  | m54308_190404_064332/64291038/ccs | Fbxw14        | 20  | 209 |
| SCGV com. | m54308_190404_170532/69665500/ccs | Fbxw14        | 104 | 228 |
| SCGV com. | m54308_190404_170532/45940828/ccs | Fbxw14        | 78  | 224 |
| SCGV com. | m54308_190404_170532/5701932/ccs  | Fbxw14        | 11  | 201 |
|           |                                   |               |     |     |
| GV rep.1  | m54219_190112_025724/12779839/ccs | Fbxw24        | 31  | 276 |
| GV rep.1  | m54219_190125_035319/73532205/ccs | Fbxw24        | 84  | 204 |
| GV rep.2  | m54308_190404_064332/62652851/ccs | Fbxw24        | 10  | 219 |
| GV rep.2  | m54308_190404_064332/11797196/ccs | Fbxw24        | 89  | 218 |
| GV rep.2  | m54308_190404_064332/39322119/ccs | Fbxw24        | 59  | 206 |
| SCGV com. | m54308_190404_170532/44761222/ccs | Fbxw24        | 27  | 211 |
|           |                                   |               |     |     |
| GV rep.1  | m54219_190112_025724/52232970/ccs | Gdf9          | 52  | 240 |
| GV rep.1  | m54219_190112_025724/67175334/ccs | Gdf9          | 66  | 213 |
| GV rep.2  | m54308_190404_064332/35913879/ccs | Gdf9          | 21  | 371 |
| GV rep.2  | m54308_190404_064332/32310106/ccs | Gdf9          | 16  | 322 |
| GV rep.2  | m54308_190404_064332/42927002/ccs | Gdf9          | 81  | 252 |
| GV rep.2  | m54308_190404_064332/43582340/ccs | Gdf9          | 34  | 239 |
| GV rep.2  | m54308_190404_064332/25822006/ccs | Gdf9          | 112 | 226 |
| GV rep.2  | m54308_190404_064332/65667638/ccs | Gdf9          | 30  | 220 |
| GV rep.2  | m54308_190404_064332/5570779/ccs  | Gdf9          | 134 | 218 |
| GV rep.2  | m54308_190404_064332/49348924/ccs | Gdf9          | 144 | 216 |
| GV rep.2  | m54308_190404_064332/13501044/ccs | Gdf9          | 27  | 214 |
| GV rep.2  | m54308_190404_064332/66323411/ccs | Gdf9          | 100 | 206 |
| SCGV com. | m54308_190404_170532/52953759/ccs | Gdf9          | 35  | 240 |
| SCGV com. | m54308_190404_170532/13370184/ccs | Gdf9          | 48  | 219 |
|           |                                   |               |     |     |
| GV rep.1  | m54219_190125_035319/5898669/ccs  | Ldhb          | 13  | 288 |
| GV rep.1  | m54219_190112_025724/32440509/ccs | Ldhb          | 61  | 236 |
| GV rep.2  | m54308_190404_064332/50266919/ccs | Ldhb          | 88  | 329 |

|           |                                   |        |     |     |
|-----------|-----------------------------------|--------|-----|-----|
| GV rep.2  | m54308_190404_064332/15925705/ccs | Ldhb   | 62  | 279 |
| GV rep.2  | m54308_190404_064332/17105379/ccs | Ldhb   | 18  | 270 |
| GV rep.2  | m54308_190404_064332/66912748/ccs | Ldhb   | 21  | 242 |
| GV rep.2  | m54308_190404_064332/34341010/ccs | Ldhb   | 46  | 238 |
| GV rep.2  | m54308_190404_064332/25363291/ccs | Ldhb   | 43  | 233 |
| GV rep.2  | m54308_190404_064332/22282679/ccs | Ldhb   | 15  | 227 |
| GV rep.2  | m54308_190404_064332/36373420/ccs | Ldhb   | 19  | 226 |
| GV rep.2  | m54308_190404_064332/59113879/ccs | Ldhb   | 56  | 226 |
| GV rep.2  | m54308_190404_064332/63177576/ccs | Ldhb   | 16  | 208 |
| GV rep.2  | m54308_190404_064332/59113590/ccs | Ldhb   | 12  | 206 |
| SCGV com. | m54308_190404_170532/39322200/ccs | Ldhb   | 17  | 251 |
|           |                                   |        |     |     |
| GV rep.1  | m54219_190125_035319/57869099/ccs | Mapk3  | 56  | 201 |
| GV rep.2  | m54308_190404_064332/51119051/ccs | Mapk3  | 26  | 206 |
| SCGV com. | m54308_190404_170532/19202888/ccs | Mapk3  | 22  | 235 |
|           |                                   |        |     |     |
| GV rep.1  | m54219_190112_025724/16056482/ccs | Med28  | 84  | 238 |
| GV rep.2  | m54308_190404_064332/55574854/ccs | Med28  | 81  | 214 |
| GV rep.2  | m54308_190404_064332/67175318/ccs | Med28  | 37  | 201 |
| SCGV com. | m54308_190404_170532/68616890/ccs | Med28  | 27  | 206 |
|           |                                   |        |     |     |
| GV rep.1  | m54219_190112_025724/23003401/ccs | Miox   | 44  | 218 |
| GV rep.2  | m54308_190404_064332/41353580/ccs | Miox   | 10  | 298 |
| GV rep.2  | m54308_190404_064332/25690280/ccs | Miox   | 15  | 235 |
| GV rep.2  | m54308_190404_064332/31129753/ccs | Miox   | 92  | 205 |
| GV rep.2  | m54308_190404_064332/10224624/ccs | Miox   | 40  | 204 |
| SCGV com. | m54308_190404_170532/46596811/ccs | Miox   | 156 | 224 |
|           |                                   |        |     |     |
| GV rep.1  | m54219_190125_035319/27197886/ccs | Mtmt14 | 55  | 219 |
| GV rep.2  | m54308_190404_064332/25690449/ccs | Mtmt14 | 39  | 213 |
| SCGV com. | m54308_190404_170532/55640349/ccs | Mtmt14 | 13  | 221 |
|           |                                   |        |     |     |
| GV rep.1  | m54219_190125_035319/71041117/ccs | Nlrp14 | 90  | 218 |
| GV rep.1  | m54219_190112_025724/38797930/ccs | Nlrp14 | 16  | 202 |
| GV rep.2  | m54308_190404_064332/9109731/ccs  | Nlrp14 | 23  | 279 |
| GV rep.2  | m54308_190404_064332/40697921/ccs | Nlrp14 | 35  | 254 |
| GV rep.2  | m54308_190404_064332/11862771/ccs | Nlrp14 | 12  | 219 |
| GV rep.2  | m54308_190404_064332/18547284/ccs | Nlrp14 | 50  | 216 |
| GV rep.2  | m54308_190404_064332/43254456/ccs | Nlrp14 | 27  | 212 |
| SCGV com. | m54308_190404_170532/28443479/ccs | Nlrp14 | 10  | 231 |



|           |                                   |        |     |     |
|-----------|-----------------------------------|--------|-----|-----|
| SCGV com. | m54308_190404_170532/10158148/ccs | Nlrp14 | 10  | 221 |
|           |                                   |        |     |     |
| GV rep.1  | m54219_190112_025724/8520010/ccs  | Nlrp5  | 47  | 217 |
| GV rep.2  | m54308_190404_064332/20513089/ccs | Nlrp5  | 12  | 333 |
| GV rep.2  | m54308_190404_064332/50987544/ccs | Nlrp5  | 30  | 227 |
| SCGV com. | m54308_190404_170532/14156647/ccs | Nlrp5  | 43  | 266 |
|           |                                   |        |     |     |
| GV rep.1  | m54219_190112_025724/21758246/ccs | Padi6  | 15  | 253 |
| GV rep.2  | m54308_190404_064332/14811979/ccs | Padi6  | 75  | 277 |
| GV rep.2  | m54308_190404_064332/36700569/ccs | Padi6  | 38  | 275 |
| GV rep.2  | m54308_190404_064332/38863593/ccs | Padi6  | 15  | 237 |
| GV rep.2  | m54308_190404_064332/15074012/ccs | Padi6  | 35  | 227 |
| GV rep.2  | m54308_190404_064332/32113516/ccs | Padi6  | 88  | 226 |
| GV rep.2  | m54297_190428_014858/24510676/ccs | Padi6  | 57  | 224 |
| GV rep.2  | m54308_190404_064332/71958741/ccs | Padi6  | 114 | 219 |
| GV rep.2  | m54308_190404_064332/74187416/ccs | Padi6  | 169 | 215 |
| GV rep.2  | m54308_190404_064332/13370065/ccs | Padi6  | 15  | 205 |
| GV rep.2  | m54308_190404_064332/49283671/ccs | Padi6  | 104 | 205 |
| GV rep.2  | m54308_190404_064332/21758893/ccs | Padi6  | 15  | 204 |
| GV rep.2  | m54308_190404_064332/42860640/ccs | Padi6  | 43  | 202 |
| SCGV com. | m54308_190404_170532/6554343/ccs  | Padi6  | 46  | 227 |
| SCGV com. | m54308_190404_170532/20579238/ccs | Padi6  | 183 | 214 |
|           |                                   |        |     |     |
| GV rep.1  | m54219_190112_025724/69862371/ccs | Pecr   | 12  | 202 |
| GV rep.2  | m54308_190404_064332/34996658/ccs | Pecr   | 40  | 263 |
| GV rep.2  | m54308_190404_064332/48169354/ccs | Pecr   | 41  | 247 |
| GV rep.2  | m54308_190404_064332/68288651/ccs | Pecr   | 28  | 232 |
| GV rep.2  | m54308_190404_064332/68485954/ccs | Pecr   | 33  | 223 |
| GV rep.2  | m54308_190404_064332/35324525/ccs | Pecr   | 76  | 216 |
| SCGV com. | m54308_190404_170532/27721893/ccs | Pecr   | 21  | 233 |
|           |                                   |        |     |     |
| GV rep.1  | m54219_190112_025724/61800649/ccs | Pttg1  | 76  | 243 |
| GV rep.1  | m54219_190125_035319/45023411/ccs | Pttg1  | 94  | 223 |
| GV rep.1  | m54219_190112_025724/12583713/ccs | Pttg1  | 38  | 222 |
| GV rep.2  | m54308_190404_064332/13238711/ccs | Pttg1  | 61  | 313 |
| GV rep.2  | m54308_190404_064332/4522918/ccs  | Pttg1  | 55  | 313 |
| GV rep.2  | m54308_190404_064332/19333312/ccs | Pttg1  | 16  | 293 |
| GV rep.2  | m54308_190404_064332/22479467/ccs | Pttg1  | 32  | 241 |
| GV rep.2  | m54308_190404_064332/47907010/ccs | Pttg1  | 63  | 236 |
| GV rep.2  | m54308_190404_064332/36110635/ccs | Pttg1  | 60  | 230 |

|           |                                   |        |     |     |
|-----------|-----------------------------------|--------|-----|-----|
| GV rep.2  | m54308_190404_064332/35717240/ccs | Pttg1  | 95  | 227 |
| GV rep.2  | m54308_190404_064332/59900714/ccs | Pttg1  | 55  | 217 |
| GV rep.2  | m54308_190404_064332/16646766/ccs | Pttg1  | 12  | 216 |
| GV rep.2  | m54308_190404_064332/37422001/ccs | Pttg1  | 28  | 211 |
| SCGV com. | m54308_190404_170532/16580979/ccs | Pttg1  | 12  | 316 |
| SCGV com. | m54308_190404_170532/60948944/ccs | Pttg1  | 63  | 251 |
| SCGV com. | m54308_190404_170532/6423288/ccs  | Pttg1  | 70  | 240 |
|           |                                   |        |     |     |
| GV rep.1  | m54219_190112_025724/30409052/ccs | Spin1  | 98  | 241 |
| GV rep.1  | m54219_190112_025724/59965590/ccs | Spin1  | 15  | 213 |
| GV rep.1  | m54219_190112_025724/30737106/ccs | Spin1  | 28  | 203 |
| GV rep.2  | m54308_190404_064332/31130225/ccs | Spin1  | 37  | 229 |
| GV rep.2  | m54308_190404_064332/40764301/ccs | Spin1  | 60  | 228 |
| GV rep.2  | m54308_190404_064332/21299654/ccs | Spin1  | 17  | 219 |
| GV rep.2  | m54308_190404_064332/53937104/ccs | Spin1  | 103 | 214 |
| SCGV com. | m54308_190404_170532/29885328/ccs | Spin1  | 94  | 248 |
| SCGV com. | m54308_190404_170532/45679166/ccs | Spin1  | 18  | 243 |
|           |                                   |        |     |     |
| GV rep.1  | m54219_190125_035319/52953633/ccs | Tuba1c | 13  | 241 |
| GV rep.2  | m54308_190404_064332/33489086/ccs | Tuba1c | 11  | 210 |
| SCGV com. | m54308_190404_170532/7799689/ccs  | Tuba1c | 41  | 201 |
|           |                                   |        |     |     |
| GV rep.1  | m54219_190112_025724/33882516/ccs | Zar1   | 66  | 202 |
| GV rep.2  | m54308_190404_064332/6030242/ccs  | Zar1   | 18  | 253 |
| GV rep.2  | m54308_190404_064332/43713054/ccs | Zar1   | 82  | 240 |
| SCGV com. | m54308_190404_170532/43450540/ccs | Zar1   | 11  | 209 |
|           |                                   |        |     |     |
| GV rep.1  | m54219_190112_025724/5112010/ccs  | Zp2    | 43  | 222 |
| GV rep.1  | m54219_190112_025724/66126140/ccs | Zp2    | 11  | 206 |
| GV rep.1  | m54219_190125_035319/44630411/ccs | Zp2    | 54  | 202 |
| GV rep.2  | m54308_190404_064332/32572045/ccs | Zp2    | 48  | 290 |
| GV rep.2  | m54308_190404_064332/37356308/ccs | Zp2    | 74  | 218 |
| GV rep.2  | m54308_190404_064332/67633674/ccs | Zp2    | 31  | 207 |
| SCGV com. | m54308_190404_170532/57082705/ccs | Zp2    | 75  | 240 |
| SCGV com. | m54308_190404_170532/24445315/ccs | Zp2    | 56  | 213 |
| SCGV com. | m54308_190404_170532/21758810/ccs | Zp2    | 22  | 202 |
| SCGV com. | m54308_190404_170532/19268296/ccs | Zp2    | 17  | 201 |
|           |                                   |        |     |     |
| GV rep.1  | m54219_190125_035319/20906176/ccs | Zp3    | 27  | 214 |
| GV rep.1  | m54219_190125_035319/20119773/ccs | Zp3    | 16  | 212 |

|           |                                   |     |     |     |
|-----------|-----------------------------------|-----|-----|-----|
| GV rep.1  | m54219_190112_025724/37093970/ccs | Zp3 | 100 | 209 |
| GV rep.2  | m54308_190404_064332/37749540/ccs | Zp3 | 59  | 296 |
| GV rep.2  | m54308_190404_064332/33948390/ccs | Zp3 | 64  | 241 |
| GV rep.2  | m54308_190404_064332/52757192/ccs | Zp3 | 114 | 233 |
| GV rep.2  | m54308_190404_064332/66847426/ccs | Zp3 | 51  | 220 |
| GV rep.2  | m54308_190404_064332/57541248/ccs | Zp3 | 39  | 204 |
| SCGV com. | m54308_190404_170532/12779992/ccs | Zp3 | 34  | 233 |
| SCGV com. | m54308_190404_170532/50266428/ccs | Zp3 | 48  | 218 |
| SCGV com. | m54308_190404_170532/53739588/ccs | Zp3 | 101 | 212 |
| SCGV com. | m54308_190404_170532/61014212/ccs | Zp3 | 86  | 211 |
| SCGV com. | m54308_190404_170532/45482366/ccs | Zp3 | 86  | 210 |
| SCGV com. | m54308_190404_170532/56230467/ccs | Zp3 | 17  | 202 |
